# Supplementary material for: Visible-light excited red emitting luminescent nanocomposites derived from Eu3+-phenathrene-based fluorinated β-diketonate complexes and multi-walled carbon nanotubes
Source: Royal Society of Chemistry journal article supplement (doi:10.1039/c2tc00186a), 2012-10-18
Supplement: c2tc00186a.pdf [file c2tc00186a.pdf]

## Supporting Information

### **Visible-light excited red emitting luminescent nanocomposites derived from Eu<sup>3+</sup>-phenanthrene-based fluorinated $\beta$ -diketonate complex and multi-walled carbon nanotubes**

**V. Divya and M. L. P. Reddy\***

*Chemical Sciences and Technology Division, CSIR-Network of Institutes for Solar Energy,  
National Institute for Interdisciplinary Science & Technology (NIIST), CSIR,  
Thiruvananthapuram-695 019, India*

E-mail: [mlpreddy55@gmail.com](mailto:mlpreddy55@gmail.com)

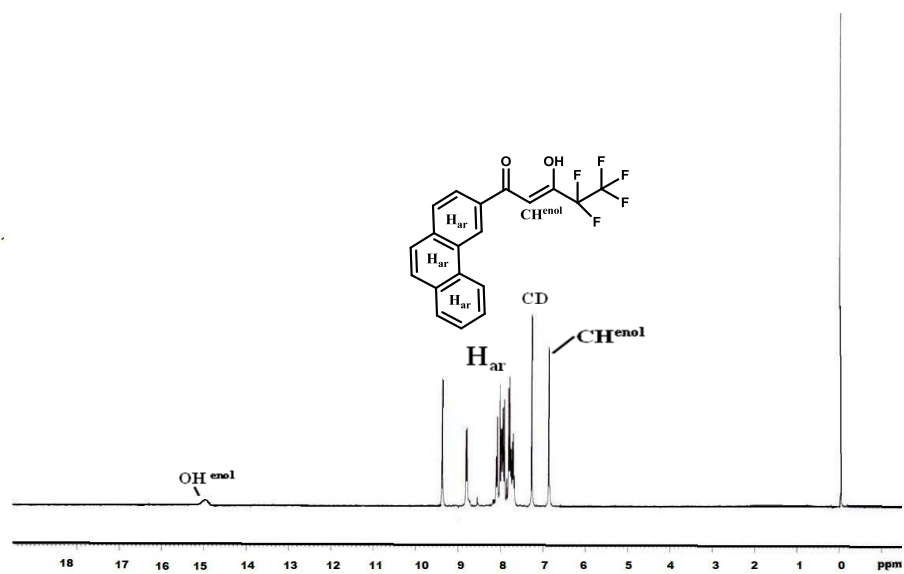

**Fig. S1**  $^1\text{H}$  NMR spectrum of the ligand Hpfppd in  $\text{CDCl}_3$ .

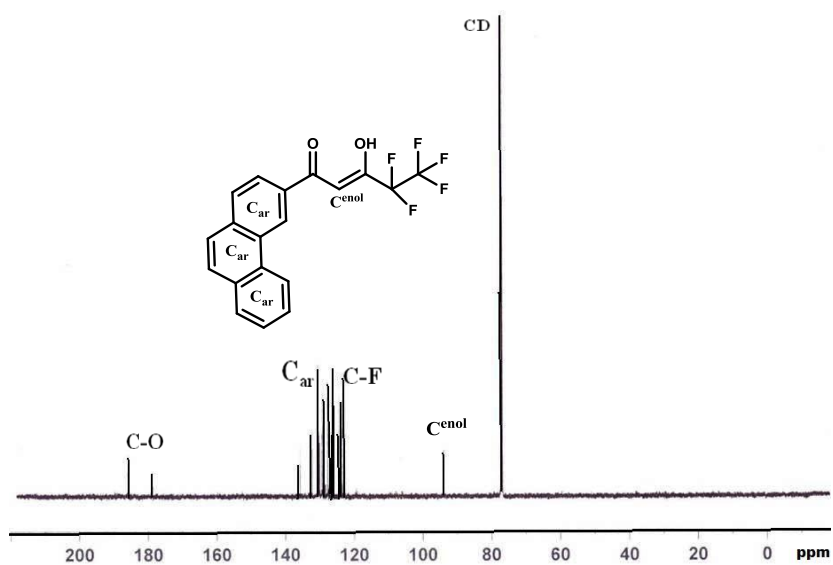

**Fig. S2**  $^{13}\text{C}$  NMR spectrum of the ligand Hpfppd in  $\text{CDCl}_3$ .

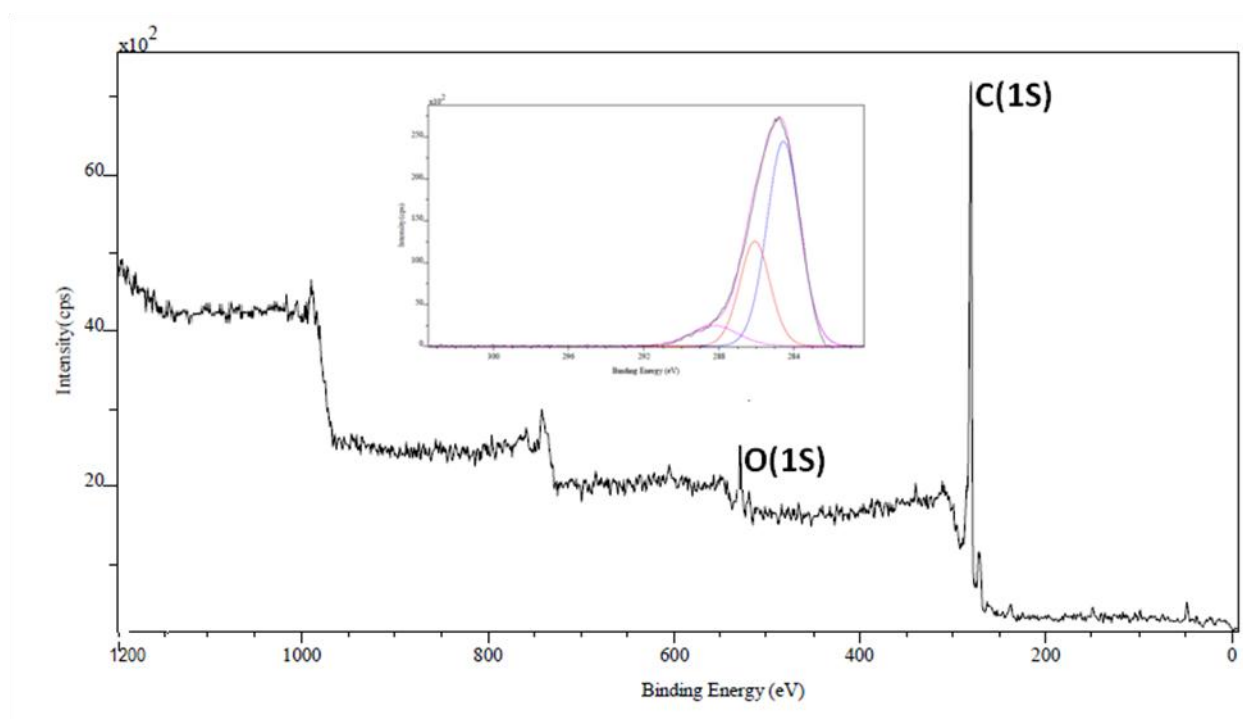

**Fig. S3** XPS spectrum of MWCNTs.

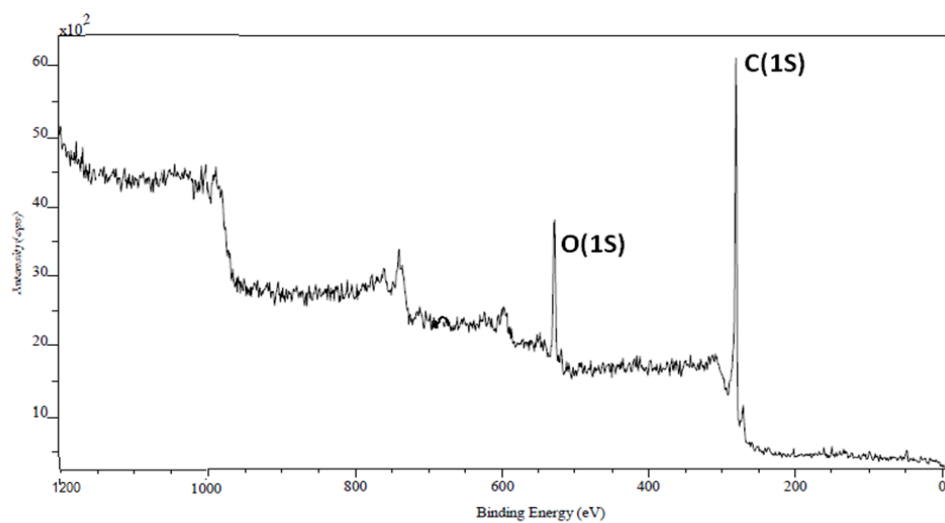

**Fig. S4** XPS spectrum of *ox*MWCNTs.

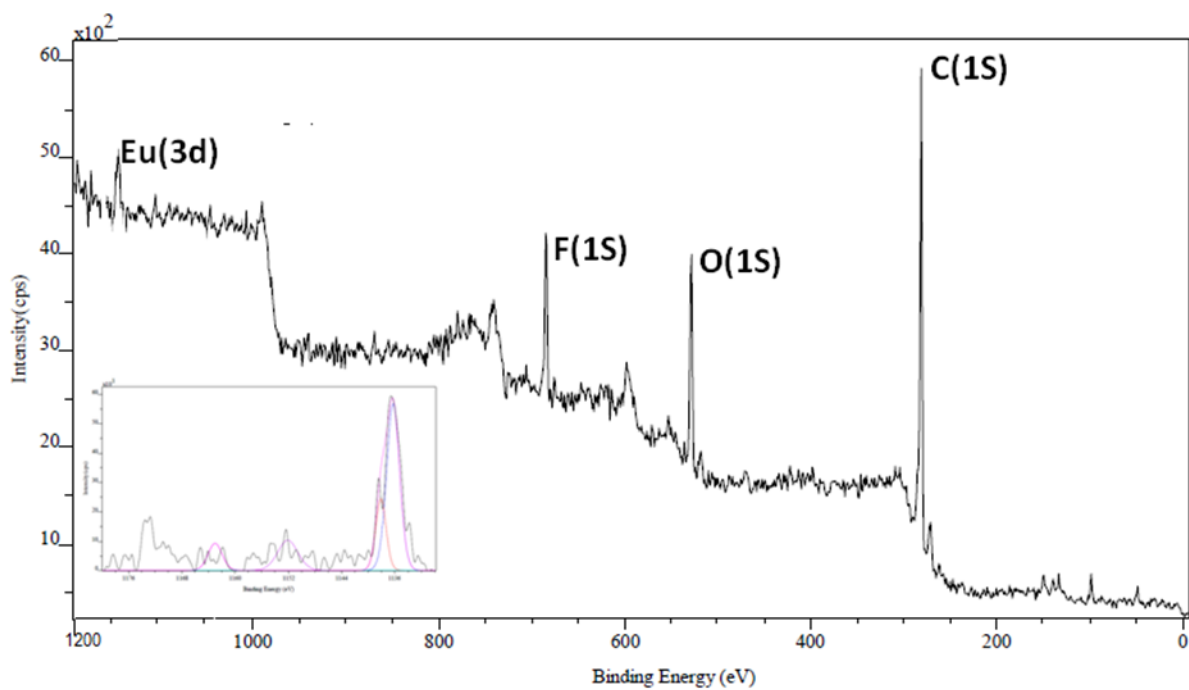

Fig. S5 XPS spectrum of **1**@oxMWCNTs.

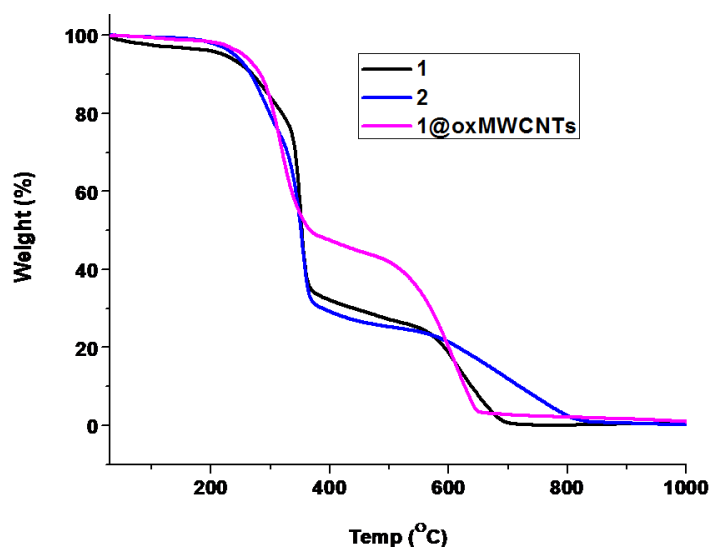

Fig. S6 TG curves for the **1**, **2** and **1**@oxMWCNTs.

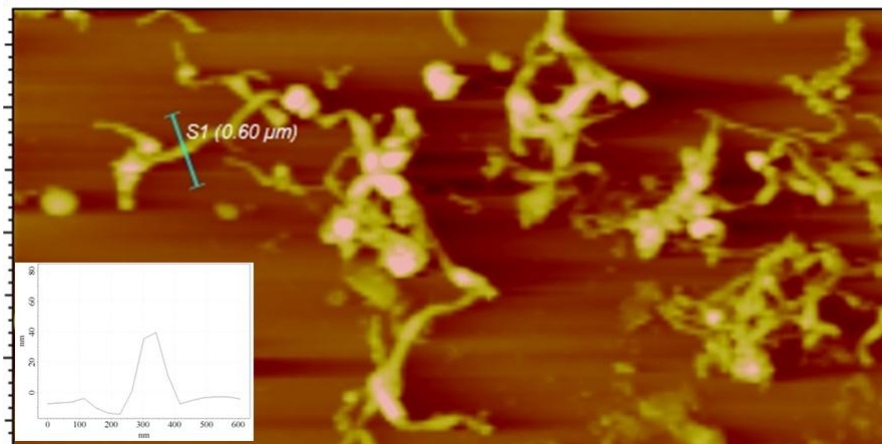

**Fig. S7** AFM images of MWCNTs (inset figure shows the diameter distribution profile).

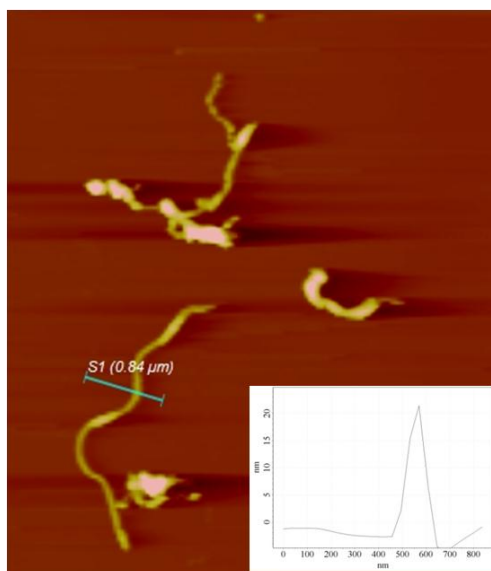

**Fig. S8** AFM images of 1@oxMWCNTs (inset figure shows the diameter distribution profile).

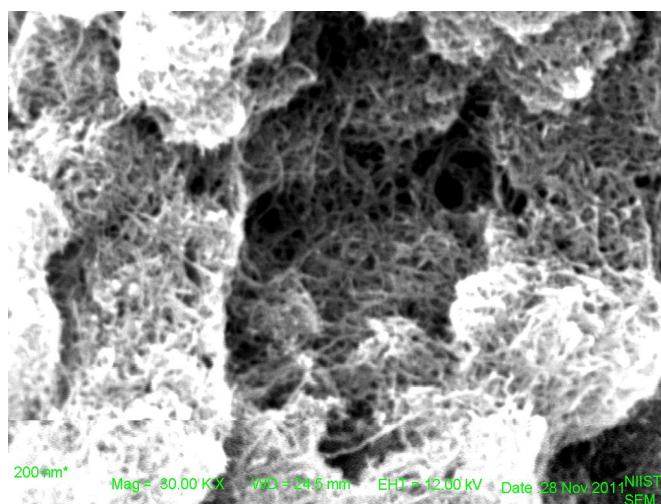

**Fig. S9** SEM image of MWCNTs.

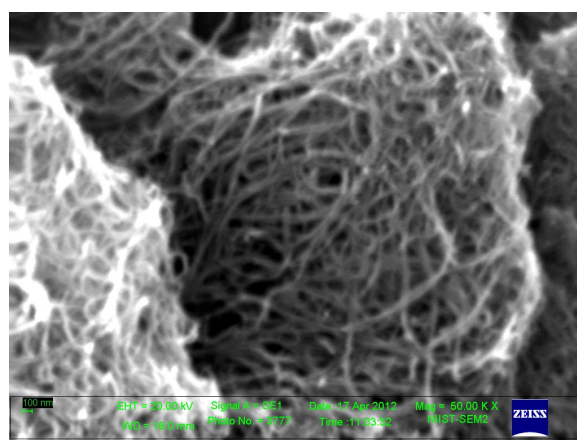

**Fig. S10** SEM images of 1@oxMWCNTs.

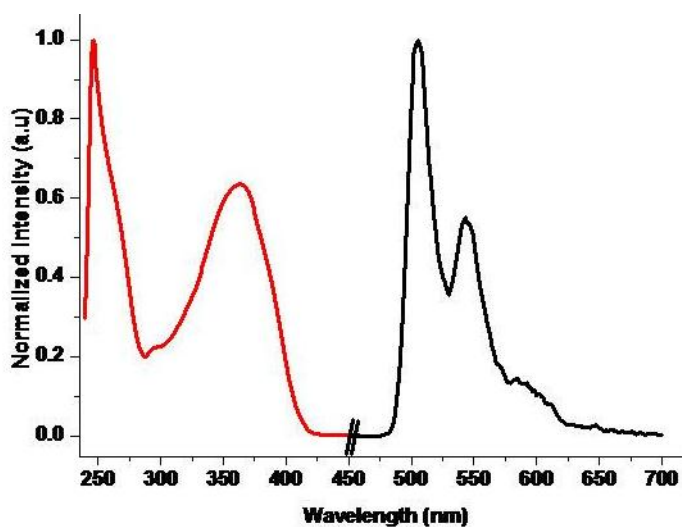

**Fig. S11** UV-vis absorption spectrum at 298 K (left), and 77 K phosphorescence spectra (right) of the complexes **3** in THF ( $c = 1 \times 10^{-5}$  M).

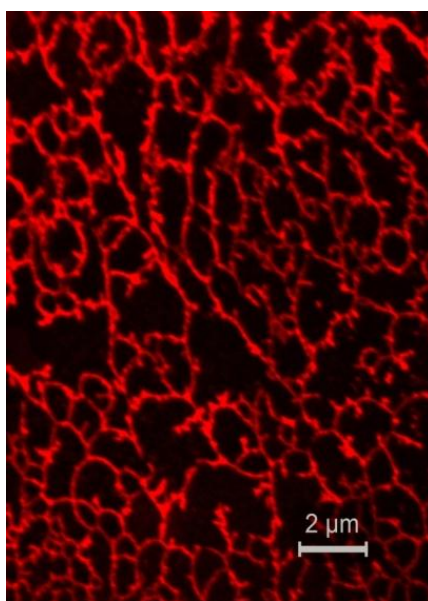

**Fig. S12** Luminescence microscopic image of **1@oxMWCNTs** at  $\lambda_{\text{ex}} = 365$  nm.
